# Supplementary material for: Higher Resistance of Yersinia enterocolitica in Comparison to Yersinia pseudotuberculosis to Antibiotics and Cinnamon, Oregano and Thyme Essential Oils
Source: MDPI journal article supplement (doi:10.3390/pathogens11121456), 2022-12-01
Supplement: s1 [file s1]

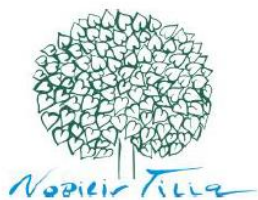

## ANALYTICAL CERTIFICATE

NAME: ESSENTIAL OIL CINNAMON

CODE: E0074

INCI: Cinnamomum Zeylanicum Bark Oil

DENSITY (20 °C) 1.034 g/cm<sup>3</sup>

REFRACTIVE INDEX (20 °C) 1.576

OPTICAL ROTATION (20 °C) -2°

| COMPONENT                | %      |
|--------------------------|--------|
| 1,8-Cineole (Eucalyptol) | 0.411  |
| Beta-caryophyllene       | 4.853  |
| Cinnamyl alcohol         | 0.157  |
| Eugenol                  | 18.205 |
| Limonene                 | 0.175  |
| Linalool                 | 2.073  |
| Para-Cymen               | 0.395  |
| Trans-cinnamaldehyde     | 65.043 |

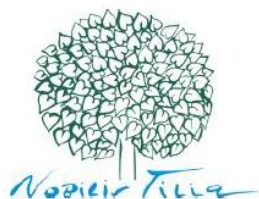

## ANALYTICAL CERTIFICATE

NAME: ESSENTIAL OIL OREGANO  
CODE: E0110  
INCI: Origanum Vulgaris Oil

DENSITY (20 °C) 0.948 g/cm<sup>3</sup>

REFRACTIVE INDEX (20 °C) 1.508

OPTICAL ROTATION (20 °C) 0°

| COMPONENT          | %      |
|--------------------|--------|
| Alpha-Pinene       | 0.776  |
| Alpha-Terpinene    | 1.186  |
| Alpha-Thujene      | 1.516  |
| Beta-caryophyllene | 2.141  |
| Beta-Pinene        | 0.200  |
| Borneol            | 0.217  |
| Gamma-Terpinene    | 6.026  |
| Camphen            | 0.237  |
| Carvacrol          | 73.561 |
| Limonene           | 0.331  |
| Linalool           | 0.100  |
| Myrcen             | 2.161  |
| Para-Cymen         | 6.972  |
| Terpin-1-en-4-ol   | 0.788  |

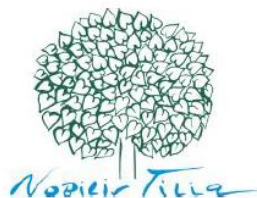

## ANALYTICAL CERTIFICATE

NAME: ESSENTIAL OIL THYME

CODE: E0069

INCI: Thymus Vulgaris Oil

DENSITY (20 °C) 0.922 g/cm<sup>3</sup>

REFRACTIVE INDEX (20 °C) 1.495

OPTICAL ROTATION (20 °C) -1°

| COMPONENT          | %      |
|--------------------|--------|
| 1,8-Cineole        | 0.243  |
| Alpha-Pinene       | 1.198  |
| Alpha-Terpinene    | 1.824  |
| Alpha-Terpineneol  | 0.224  |
| Alpha-Thujene      | 0.888  |
| Beta-caryophyllene | 3.587  |
| Beta-Pinene        | 0.200  |
| Borneol            | 1.083  |
| Gamma-Terpinene    | 12.216 |
| Camphen            | 0.786  |
| Camphor            | 0.649  |
| Carvacrol          | 2.413  |
| Carvone            | 0.256  |
| Limonene           | 0.428  |
| Linalool           | 3.047  |
| Myrcen             | 2.082  |
| Para-Cymen         | 17.668 |
| Terpin-1-en-4-ol   | 1.399  |
| Thymol             | 45.847 |
